# Supplementary material for: Investigation of thresholds in laser-induced carbonization of sumanene derivatives through in situ observation utilizing a Raman spectroscope
Source: Royal Society of Chemistry journal article supplement (doi:10.1039/c5ra00747j), 2015-01-01
Supplement: c5ra00747j1.pdf [file c5ra00747j1.pdf]

# **Investigation of threshold in laser-induced carbonization of sumanene derivatives through *in situ* observation utilizing a Raman spectroscope**

Yuhi Inada,<sup>a</sup> Toru Amaya<sup>a</sup> and Toshikazu Hirao<sup>\*a,b</sup>

<sup>a</sup> Department of Applied Chemistry, Graduate School of Engineering, Osaka University, Yamada-oka, Suita,  
Osaka 565-0871, (Japan). E-mail: hirao@chem.eng.osaka-u.ac.jp

<sup>b</sup> JST, ACT-C, 4-1-8 Honcho, Kawaguchi, Saitama 332-0012, (Japan).

## **Supplementary information**

## 1) Materials preparation

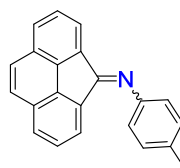

**2b**

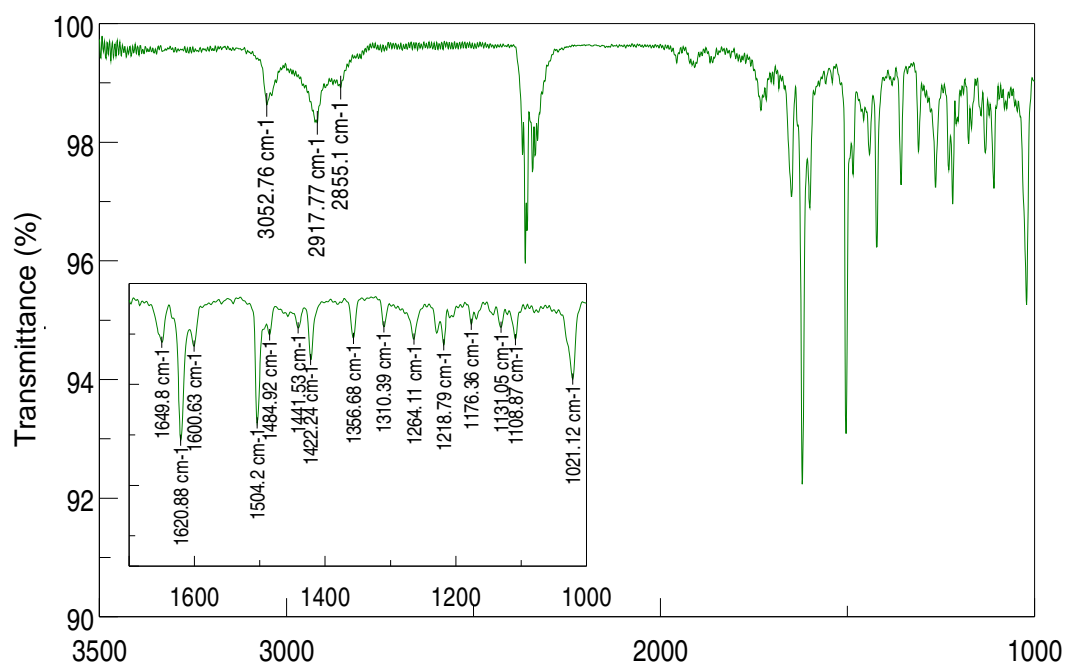

**Fig. S1.** FT-IR spectra of **2b** (ATR, powder).

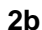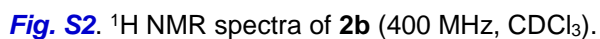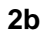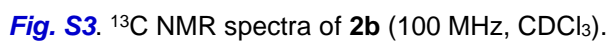

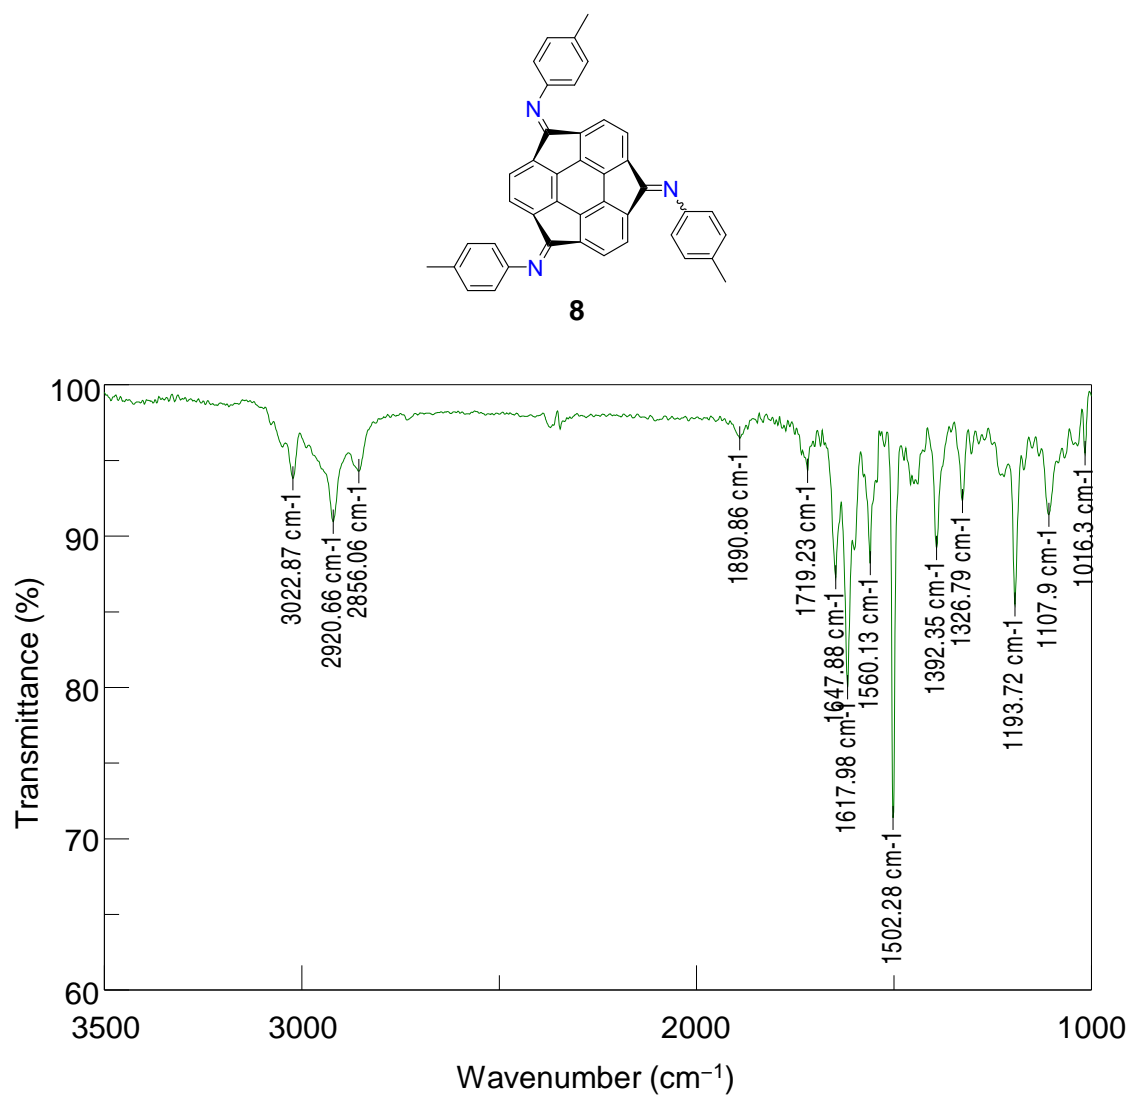

**Fig. S4.** FT-IR spectrum of **8** (KBr).

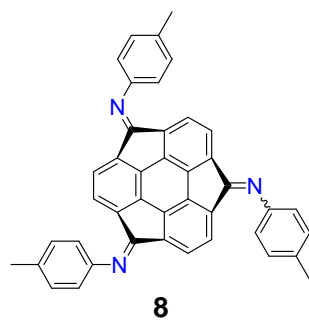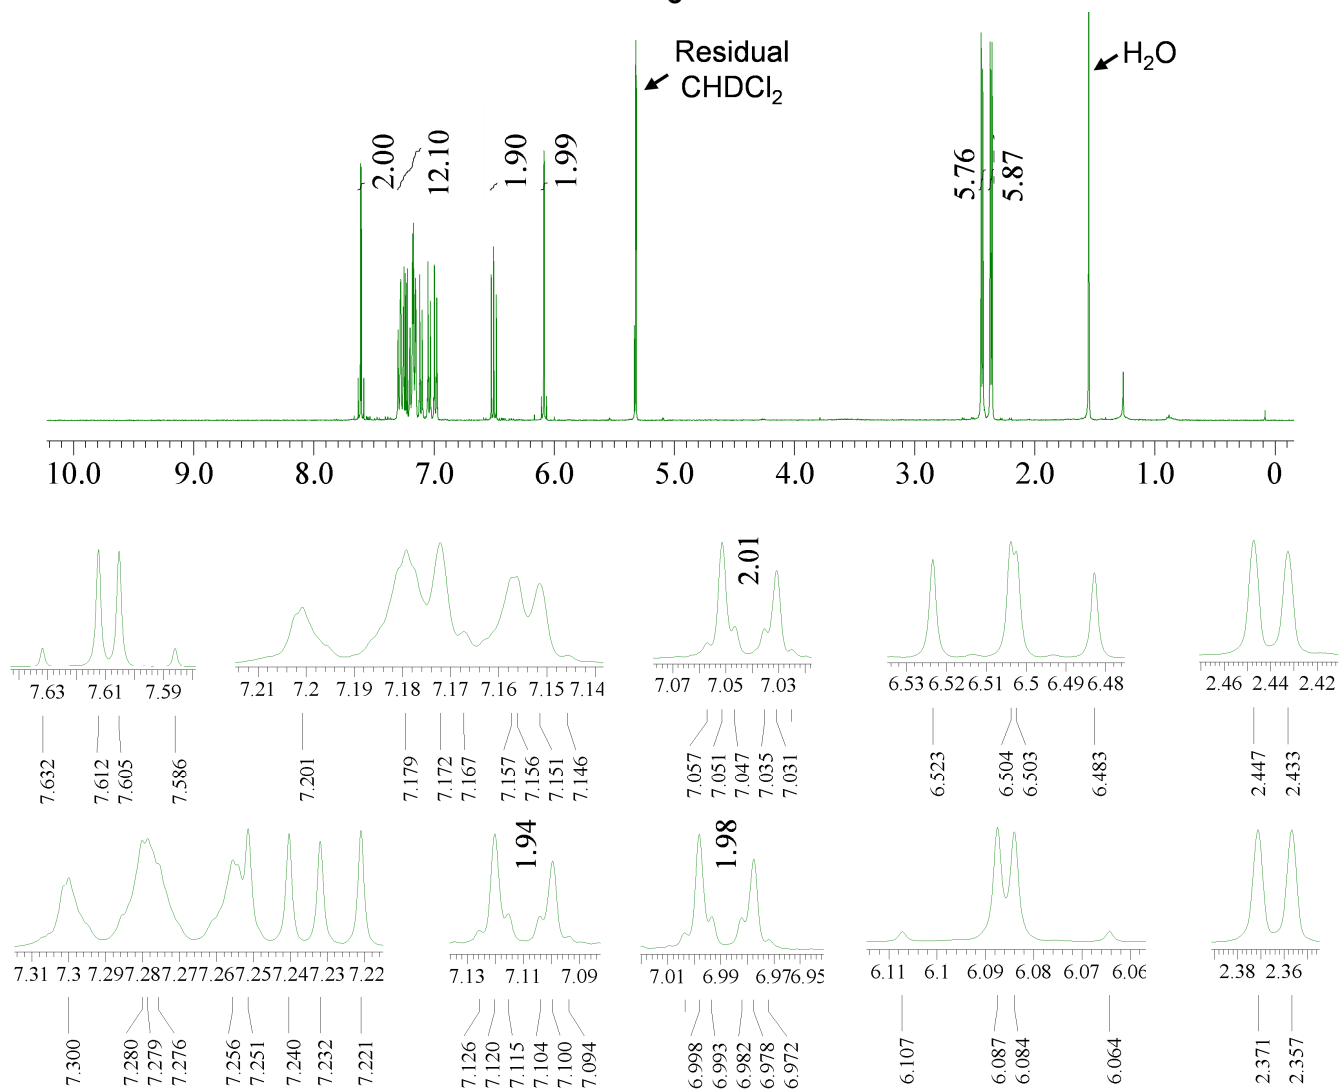

**Fig. S5.** <sup>1</sup>H NMR spectra of **8** (400 MHz, CD<sub>2</sub>Cl<sub>2</sub>).

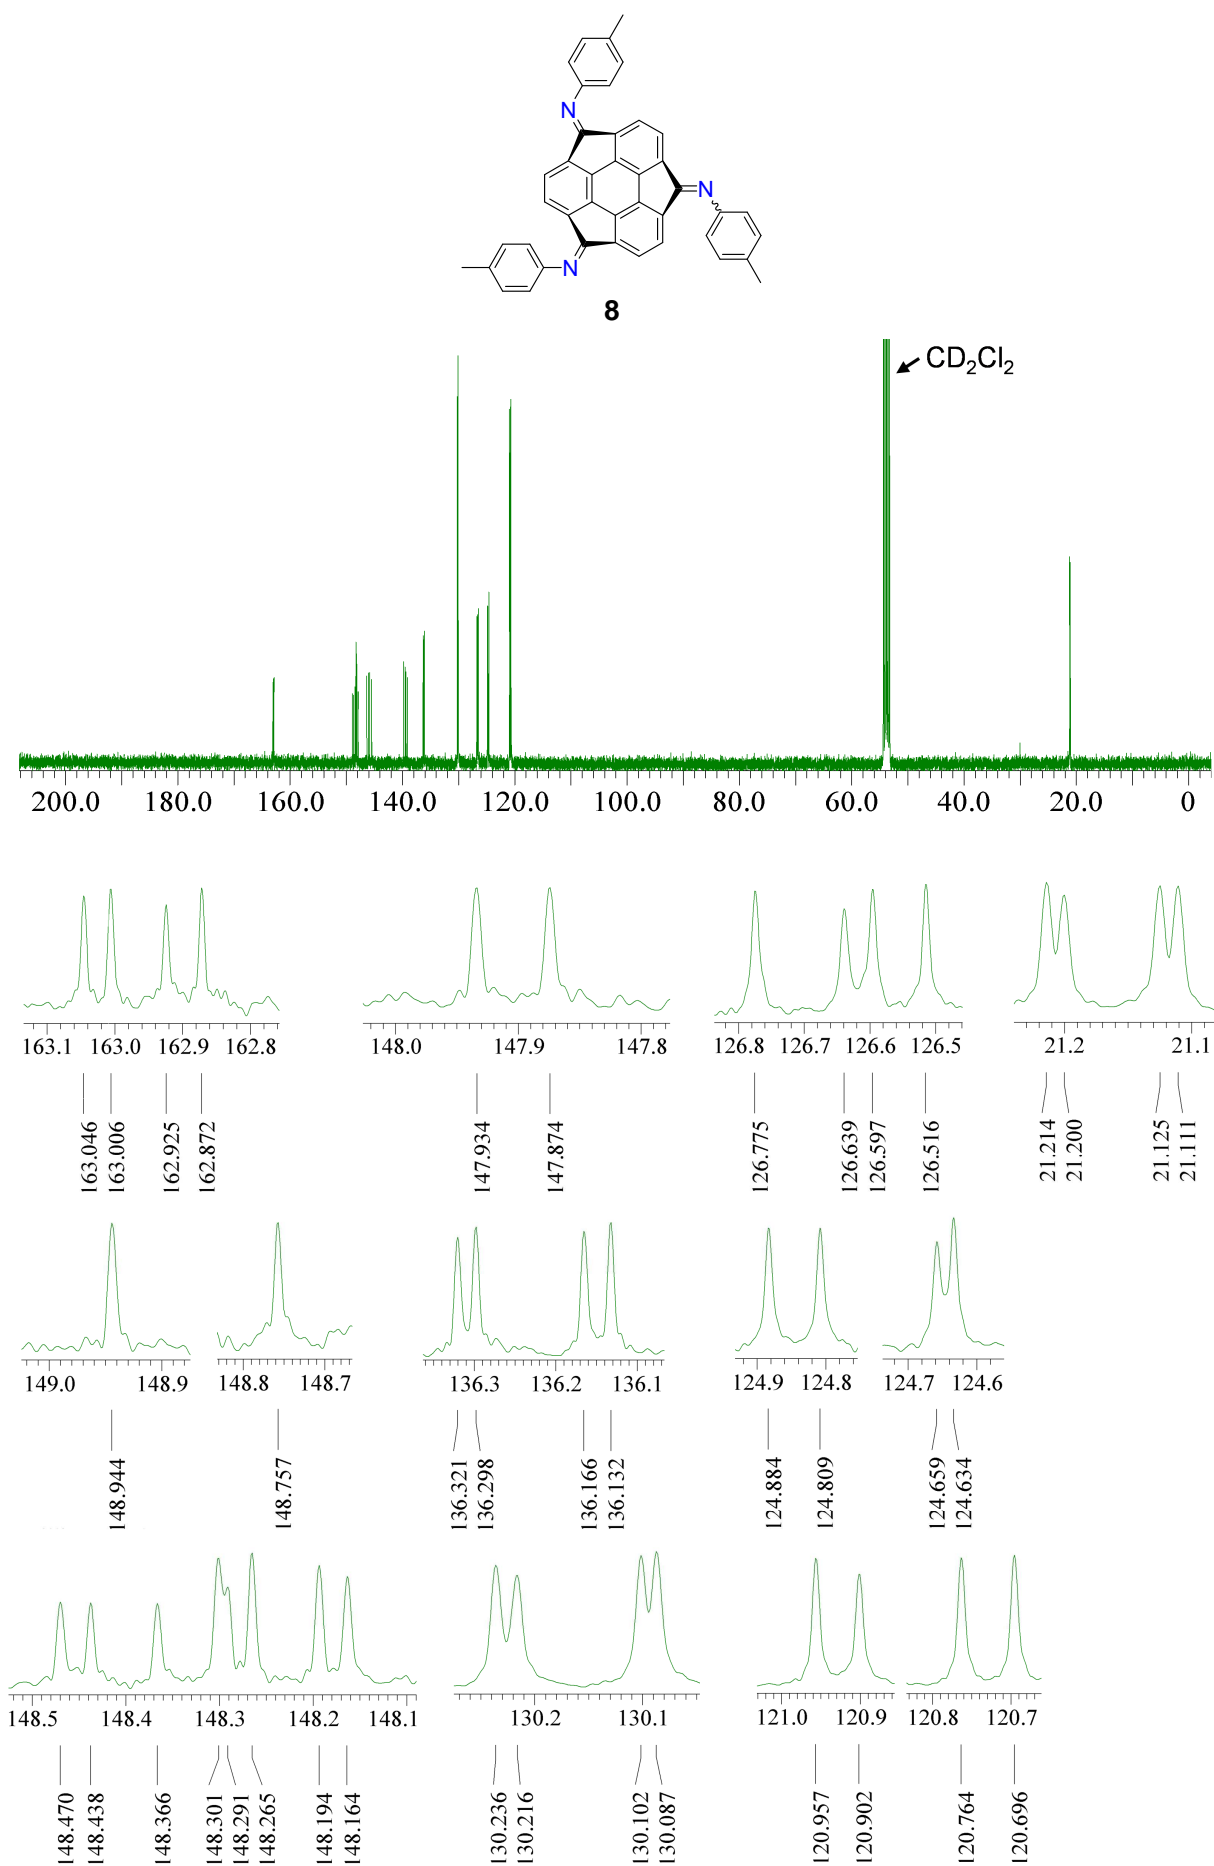

**Fig. S6.**  $^{13}\text{C}$  NMR spectra of **8** (100 MHz,  $\text{CD}_2\text{Cl}_2$ ).

## 2) Materials characterization

**Table S1.** Carbonization and Raman measurement conditions, and the resulting raw and modified Raman spectra after exposing **1a** to 532 nm laser.

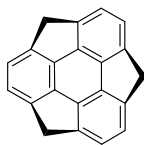

**1a**

| Carbonization conditions <sup>a</sup> |                                       |                   | Raman measurement conditions <sup>a</sup> |                                       |                   |                   | Spectra after laser exposure                                                         |                       |                            |
|---------------------------------------|---------------------------------------|-------------------|-------------------------------------------|---------------------------------------|-------------------|-------------------|--------------------------------------------------------------------------------------|-----------------------|----------------------------|
| OD <sup>b</sup>                       | Laser energy<br>(W cm <sup>-2</sup> ) | Exposure time (s) | OD <sup>b</sup>                           | Laser energy<br>(W cm <sup>-2</sup> ) | Exposure time (s) | Cumulative number | Raw                                                                                  | Modified <sup>c</sup> | G and D bands <sup>d</sup> |
| 2                                     | 4.1×10 <sup>3</sup>                   | 60                | 2                                         | 4.1×10 <sup>3</sup>                   | 5                 | 5                 | 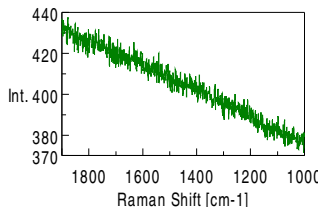   | — <sup>e</sup>        | ×                          |
| 1                                     | 4.1×10 <sup>4</sup>                   | 60                | 2                                         | 4.1×10 <sup>3</sup>                   | 5                 | 5                 |   | — <sup>e</sup>        | ×                          |
| 0.6                                   | 7.5×10 <sup>4</sup>                   | 30                | 2                                         | 4.1×10 <sup>3</sup>                   | 5                 | 5                 |  | — <sup>e</sup>        | ○                          |
| 0.3                                   | 1.5×10 <sup>5</sup>                   | 10                | 2                                         | 4.1×10 <sup>3</sup>                   | 5                 | 5                 |  | — <sup>e</sup>        | ○                          |
| 0                                     | 2.9×10 <sup>5</sup>                   | 5                 | 2                                         | 4.1×10 <sup>3</sup>                   | 5                 | 5                 |  | — <sup>e</sup>        | ○                          |

<sup>a</sup> Magnification of objective lens was 100 times.

<sup>b</sup> Optical density (OD) of a neutral density (ND) filter.

<sup>c</sup> Modified spectra were displayed after subtracting linear background and normalizing them for ease of comparing them with each other. Vertical axis exhibits the Raman intensity with arbitrary unit.

<sup>d</sup> ×, ▲, and ○ denote the case when G and D bands were not detected, when it was difficult to judge detection of G and D bands, and when G and D bands were clearly detected, respectively.

<sup>e</sup> The modified spectra are shown in Fig. 2a.

**Table S2.** Carbonization and Raman measurement conditions, and the resulting raw and modified Raman spectra after exposing **2a** to 532 nm laser.

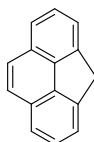

**2a**

| Carbonization conditions <sup>a</sup> |                                    |                   | Raman measurement conditions <sup>a</sup> |                                    |                   |                   | Spectra after laser exposure                                                         |                       |                            |
|---------------------------------------|------------------------------------|-------------------|-------------------------------------------|------------------------------------|-------------------|-------------------|--------------------------------------------------------------------------------------|-----------------------|----------------------------|
| OD <sup>b</sup>                       | Laser energy (W cm <sup>-2</sup> ) | Exposure time (s) | OD <sup>b</sup>                           | Laser energy (W cm <sup>-2</sup> ) | Exposure time (s) | Cumulative number | Raw                                                                                  | Modified <sup>c</sup> | G and D bands <sup>d</sup> |
| 2                                     | 3.5×10 <sup>3</sup>                | 30                | 3                                         | 3.5×10 <sup>2</sup>                | 5                 | 10                | 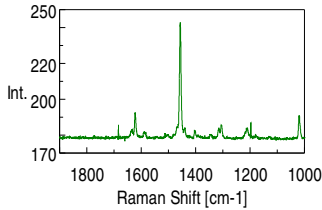   | — <sup>e</sup>        | ×                          |
| 1                                     | 3.5×10 <sup>4</sup>                | 30                | 3                                         | 3.5×10 <sup>2</sup>                | 5                 | 10                |   | — <sup>e</sup>        | ×                          |
| 0.6                                   | 8.8×10 <sup>4</sup>                | 60                | 3                                         | 3.5×10 <sup>2</sup>                | 5                 | 10                |  | — <sup>e</sup>        | ▲                          |
| 0.3                                   | 1.8×10 <sup>5</sup>                | 60                | 1                                         | 3.5×10 <sup>2</sup>                | 5                 | 10                |  | — <sup>e</sup>        | ○                          |
| 0                                     | 3.5×10 <sup>5</sup>                | 120               | 1                                         | 3.5×10 <sup>2</sup>                | 5                 | 10                |  | — <sup>e</sup>        | ○                          |

<sup>a</sup> Magnification of objective lens was 100 times.

<sup>b</sup> Optical density (OD) of a neutral density (ND) filter.

<sup>c</sup> Modified spectra were displayed after subtracting linear background and normalizing them for ease of comparing them with each other. Vertical axis exhibits the Raman intensity with arbitrary unit.

<sup>d</sup> ×, ▲, and ○ denote the case when G and D bands were not detected, when it was difficult to judge detection of G and D bands, and when G and D bands were clearly detected, respectively.

<sup>e</sup> The modified spectra are shown in Fig. 2b.



**Table S3.** Carbonization and Raman measurement conditions, and the resulting raw and modified Raman spectra after exposing **3a** to 532 nm laser.

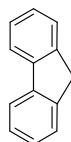

**3a**

| Carbonization conditions <sup>a</sup> |                                    |                   | Raman measurement conditions <sup>a</sup> |                                    |                   |                   | Spectra after laser exposure |                       |                            |
|---------------------------------------|------------------------------------|-------------------|-------------------------------------------|------------------------------------|-------------------|-------------------|------------------------------|-----------------------|----------------------------|
| OD <sup>b</sup>                       | Laser energy (W cm <sup>-2</sup> ) | Exposure time (s) | OD <sup>b</sup>                           | Laser energy (W cm <sup>-2</sup> ) | Exposure time (s) | Cumulative number | Raw                          | Modified <sup>c</sup> | G and D bands <sup>d</sup> |
| 2                                     | 1.9×10 <sup>3</sup>                | 60                | 2                                         | 1.9×10 <sup>3</sup>                | 5                 | 20                |                              | — <sup>e</sup>        | ×                          |
| 1                                     | 1.9×10 <sup>4</sup>                | 60                | 1                                         | 1.9×10 <sup>4</sup>                | 5                 | 20                |                              | — <sup>e</sup>        | ×                          |
| 0.6                                   | 4.8×10 <sup>4</sup>                | 60                | 0.6                                       | 4.8×10 <sup>4</sup>                | 5                 | 20                |                              | — <sup>e</sup>        | ×                          |
| 0.3                                   | 9.6×10 <sup>4</sup>                | 60                | 0.3                                       | 9.6×10 <sup>4</sup>                | 5                 | 20                |                              | — <sup>e</sup>        | ×                          |
| 0                                     | 1.9×10 <sup>5</sup>                | 60                | 0                                         | 1.9×10 <sup>5</sup>                | 60                | 20                |                              | — <sup>e</sup>        | ▲                          |

<sup>a</sup> Magnification of objective lens was 100 times.

<sup>b</sup> Optical density (OD) of a neutral density (ND) filter.

<sup>c</sup> Modified spectra were displayed after subtracting linear background and normalizing them for ease of comparing them with each other. Vertical axis exhibits the Raman intensity with arbitrary unit.

<sup>d</sup> ×, ▲, and ○ denote the case when G and D bands were not detected, when it was difficult to judge detection of G and D bands, and when G and D bands were clearly detected, respectively.

<sup>e</sup> The modified spectra are shown in Fig. 2c.

**Table S4.** Carbonization and Raman measurement conditions, and the resulting raw and modified Raman spectra after exposing **1b** to 532 nm laser.

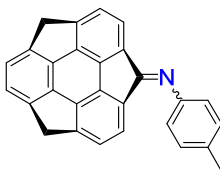

**1b**

| Carbonization conditions <sup>a</sup> |                                    |                   | Raman measurement conditions <sup>a</sup> |                                    |                   |                   | Spectra after laser exposure                                                         |                       |                            |
|---------------------------------------|------------------------------------|-------------------|-------------------------------------------|------------------------------------|-------------------|-------------------|--------------------------------------------------------------------------------------|-----------------------|----------------------------|
| OD <sup>b</sup>                       | Laser energy (W cm <sup>-2</sup> ) | Exposure time (s) | OD <sup>b</sup>                           | Laser energy (W cm <sup>-2</sup> ) | Exposure time (s) | Cumulative number | Raw                                                                                  | Modified <sup>c</sup> | G and D bands <sup>d</sup> |
| 2                                     | 2.1×10 <sup>3</sup>                | 60                | 2                                         | 2.1×10 <sup>3</sup>                | 5                 | 20                | 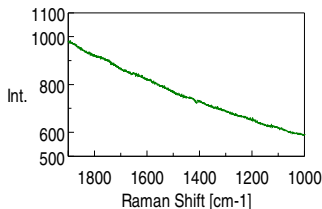   | — <sup>e</sup>        | ▲                          |
| 1                                     | 2.1×10 <sup>4</sup>                | 60                | 2                                         | 2.1×10 <sup>3</sup>                | 5                 | 20                |   | — <sup>e</sup>        | ○                          |
| 0.6                                   | 5.3×10 <sup>4</sup>                | 60                | 2                                         | 2.1×10 <sup>3</sup>                | 5                 | 20                |  | — <sup>e</sup>        | ○                          |
| 0.3                                   | 1.0×10 <sup>5</sup>                | 60                | 2                                         | 2.1×10 <sup>3</sup>                | 5                 | 20                |  | — <sup>e</sup>        | ○                          |
| 0                                     | 2.1×10 <sup>5</sup>                | 60                | 2                                         | 2.1×10 <sup>3</sup>                | 5                 | 20                |  | — <sup>e</sup>        | ○                          |

<sup>a</sup> Magnification of objective lens was 100 times.

<sup>b</sup> Optical density (OD) of a neutral density (ND) filter.

<sup>c</sup> Modified spectra were displayed after subtracting linear background and normalizing them for ease of comparing them with each other. Vertical axis exhibits the Raman intensity with arbitrary unit.

<sup>d</sup> ×, ▲, and ○ denote the case when G and D bands were not detected, when it was difficult to judge detection of G and D bands, and when G and D bands were clearly detected, respectively.

<sup>e</sup> The modified spectra are shown in Fig. 2d.

**Table S5.** Carbonization and Raman measurement conditions, and the resulting raw and modified Raman spectra after exposing **2b** to 532 nm laser.

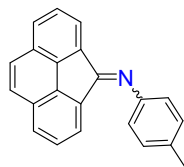

**2b**

| Carbonization conditions <sup>a</sup> |                                    |                   | Raman measurement conditions <sup>a</sup> |                                    |                   |                   | Spectra after laser exposure |                       |                            |
|---------------------------------------|------------------------------------|-------------------|-------------------------------------------|------------------------------------|-------------------|-------------------|------------------------------|-----------------------|----------------------------|
| OD <sup>b</sup>                       | Laser energy (W cm <sup>-2</sup> ) | Exposure time (s) | OD <sup>b</sup>                           | Laser energy (W cm <sup>-2</sup> ) | Exposure time (s) | Cumulative number | Raw                          | Modified <sup>c</sup> | G and D bands <sup>d</sup> |
| 3                                     | 2.0×10 <sup>2</sup>                | 60                | 2                                         | 2.0×10 <sup>3</sup>                | 5                 | 20                |                              | — <sup>e</sup>        | ×                          |
| 2                                     | 2.0×10 <sup>3</sup>                | 60                | 2                                         | 2.0×10 <sup>3</sup>                | 5                 | 20                |                              | — <sup>e</sup>        | ×                          |
| 1                                     | 2.1×10 <sup>4</sup>                | 60                | 2                                         | 2.0×10 <sup>3</sup>                | 5                 | 20                |                              | — <sup>e</sup>        | ▲                          |
| 0.6                                   | 5.2×10 <sup>4</sup>                | 60                | 2                                         | 2.0×10 <sup>3</sup>                | 5                 | 20                |                              | — <sup>e</sup>        | ○                          |
| 0.3                                   | 1.0×10 <sup>5</sup>                | 60                | 2                                         | 2.0×10 <sup>3</sup>                | 5                 | 20                |                              | — <sup>e</sup>        | ○                          |

<sup>a</sup> Magnification of objective lens was 100 times.

<sup>b</sup> Optical density (OD) of a neutral density (ND) filter.

<sup>c</sup> Modified spectra were displayed after subtracting linear background and normalizing them for ease of comparing them with each other. Vertical axis exhibits the Raman intensity with arbitrary unit.

<sup>d</sup> ×, ▲, and ○ denote the case when G and D bands were not detected, when it was difficult to judge detection of G and D bands, and when G and D bands were clearly detected, respectively.

<sup>e</sup> The modified spectra are shown in Fig. 2e.

**Table S6.** Carbonization and Raman measurement conditions, and the resulting raw and modified Raman spectra after exposing **3b** to 532 nm laser.

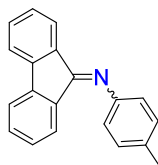

**3b**

| Carbonization conditions <sup>a</sup> |                                    |                   | Raman measurement conditions <sup>a</sup> |                                    |                   |                   | Spectra after laser exposure |                       |                            |
|---------------------------------------|------------------------------------|-------------------|-------------------------------------------|------------------------------------|-------------------|-------------------|------------------------------|-----------------------|----------------------------|
| OD <sup>b</sup>                       | Laser energy (W cm <sup>-2</sup> ) | Exposure time (s) | OD <sup>b</sup>                           | Laser energy (W cm <sup>-2</sup> ) | Exposure time (s) | Cumulative number | Raw                          | Modified <sup>c</sup> | G and D bands <sup>d</sup> |
| 2                                     | 2.2×10 <sup>3</sup>                | 60                | 2                                         | 2.2×10 <sup>3</sup>                | 5                 | 20                |                              | — <sup>e</sup>        | ×                          |
| 1                                     | 2.2×10 <sup>4</sup>                | 60                | 2                                         | 2.2×10 <sup>3</sup>                | 5                 | 20                |                              | — <sup>e</sup>        | ▲                          |
| 0.6                                   | 5.9×10 <sup>4</sup>                | 60                | 2                                         | 2.2×10 <sup>3</sup>                | 5                 | 20                |                              | — <sup>e</sup>        | ▲                          |
| 0.3                                   | 1.1×10 <sup>5</sup>                | 60                | 2                                         | 2.2×10 <sup>3</sup>                | 5                 | 20                |                              | — <sup>e</sup>        | ○                          |
| 0                                     | 2.2×10 <sup>5</sup>                | 60                | 2                                         | 2.2×10 <sup>3</sup>                | 5                 | 20                |                              | — <sup>e</sup>        | ○                          |

<sup>a</sup> Magnification of objective lens was 100 times.

<sup>b</sup> Optical density (OD) of a neutral density (ND) filter.

<sup>c</sup> Modified spectra were displayed after subtracting linear background and normalizing them for ease of comparing them with each other. Vertical axis exhibits the Raman intensity with arbitrary unit.

<sup>d</sup> ×, ▲, and ○ denote the case when G and D bands were not detected, when it was difficult to judge detection of G and D bands, and when G and D bands were clearly detected, respectively.

<sup>e</sup> The modified spectra are shown in Fig. 2f.

**Table S7.** Carbonization and Raman measurement conditions, and the resulting raw and modified Raman spectra after exposing **1c** to 532 nm laser.

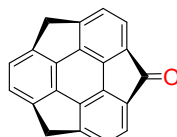

**1c**

| Carbonization conditions <sup>a</sup> |                                    |                   | Raman measurement conditions <sup>a</sup> |                                    |                   |                   | Spectra after laser exposure |                       |                            |
|---------------------------------------|------------------------------------|-------------------|-------------------------------------------|------------------------------------|-------------------|-------------------|------------------------------|-----------------------|----------------------------|
| OD <sup>b</sup>                       | Laser energy (W cm <sup>-2</sup> ) | Exposure time (s) | OD <sup>b</sup>                           | Laser energy (W cm <sup>-2</sup> ) | Exposure time (s) | Cumulative number | Raw                          | Modified <sup>c</sup> | G and D bands <sup>d</sup> |
| 2                                     | 2.9×10 <sup>3</sup>                | 60                | 2                                         | 2.9×10 <sup>3</sup>                | 5                 | 5                 |                              | — <sup>e</sup>        | ▲                          |
| 1                                     | 4.1×10 <sup>4</sup>                | 60                | 2                                         | 2.9×10 <sup>3</sup>                | 5                 | 5                 |                              | — <sup>e</sup>        | ▲                          |
| 0.6                                   | 6.8×10 <sup>4</sup>                | 60                | 2                                         | 2.9×10 <sup>3</sup>                | 5                 | 5                 |                              | — <sup>e</sup>        | ○                          |
| 0.3                                   | 1.5×10 <sup>5</sup>                | 60                | 2                                         | 2.9×10 <sup>3</sup>                | 5                 | 5                 |                              | — <sup>e</sup>        | ○                          |
| 0                                     | 2.9×10 <sup>5</sup>                | 60                | 2                                         | 2.9×10 <sup>3</sup>                | 5                 | 5                 |                              | — <sup>e</sup>        | ○                          |

<sup>a</sup> Magnification of objective lens was 100 times.

<sup>b</sup> Optical density (OD) of a neutral density (ND) filter.

<sup>c</sup> Modified spectra were displayed after subtracting linear background and normalizing them for ease of comparing them with each other. Vertical axis exhibits the Raman intensity with arbitrary unit.

<sup>d</sup> ×, ▲, and ○ denote the case when G and D bands were not detected, when it was difficult to judge detection of G and D bands, and when G and D bands were clearly detected, respectively.

<sup>e</sup> The modified spectra are shown in Fig. 2g.

**Table S8.** Carbonization and Raman measurement conditions, and the resulting raw and modified Raman spectra after exposing **2c** to 532 nm laser.

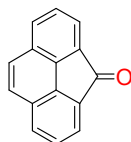

**2c**

| Carbonization conditions <sup>a</sup> |                                    |                   | Raman measurement conditions <sup>a</sup> |                                    |                   |                   | Spectra after laser exposure |                       |                            |
|---------------------------------------|------------------------------------|-------------------|-------------------------------------------|------------------------------------|-------------------|-------------------|------------------------------|-----------------------|----------------------------|
| OD <sup>b</sup>                       | Laser energy (W cm <sup>-2</sup> ) | Exposure time (s) | OD <sup>b</sup>                           | Laser energy (W cm <sup>-2</sup> ) | Exposure time (s) | Cumulative number | Raw                          | Modified <sup>c</sup> | G and D bands <sup>d</sup> |
| 2                                     | 3.2×10 <sup>3</sup>                | 60                | 2                                         | 3.2×10 <sup>3</sup>                | 5                 | 10                |                              | — <sup>e</sup>        | ×                          |
| 1                                     | 3.2×10 <sup>4</sup>                | 60                | 2                                         | 3.2×10 <sup>3</sup>                | 5                 | 10                |                              | — <sup>e</sup>        | ▲                          |
| 0.6                                   | 8.0×10 <sup>4</sup>                | 60                | 2                                         | 3.2×10 <sup>3</sup>                | 5                 | 10                |                              | — <sup>e</sup>        | ▲                          |
| 0.3                                   | 1.6×10 <sup>5</sup>                | 60                | 2                                         | 3.2×10 <sup>3</sup>                | 5                 | 10                |                              | — <sup>e</sup>        | ▲                          |
| 0                                     | 3.2×10 <sup>5</sup>                | 60                | 2                                         | 3.2×10 <sup>3</sup>                | 5                 | 20                |                              | — <sup>e</sup>        | ○                          |

<sup>a</sup> Magnification of objective lens was 100 times.

<sup>b</sup> Optical density (OD) of a neutral density (ND) filter.

<sup>c</sup> Modified spectra were displayed after subtracting linear background and normalizing them for ease of comparing them with each other. Vertical axis exhibits the Raman intensity with arbitrary unit.

<sup>d</sup> ×, ▲, and ○ denote the case when G and D bands were not detected, when it was difficult to judge detection of G and D bands, and when G and D bands were clearly detected, respectively.

<sup>e</sup> The modified spectra are shown in Fig. 2h.

**Table S9.** Carbonization and Raman measurement conditions, and the resulting raw and modified Raman spectra after exposing **3c** to 532 nm laser.

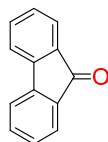

**3c**

| Carbonization conditions <sup>a</sup> |                                    |                   | Raman measurement conditions <sup>a</sup> |                                    |                   |                   | Spectra after laser exposure                                                         |                       |                            |
|---------------------------------------|------------------------------------|-------------------|-------------------------------------------|------------------------------------|-------------------|-------------------|--------------------------------------------------------------------------------------|-----------------------|----------------------------|
| OD <sup>b</sup>                       | Laser energy (W cm <sup>-2</sup> ) | Exposure time (s) | OD <sup>b</sup>                           | Laser energy (W cm <sup>-2</sup> ) | Exposure time (s) | Cumulative number | Raw                                                                                  | Modified <sup>c</sup> | G and D bands <sup>d</sup> |
| 2                                     | 1.9×10 <sup>3</sup>                | 60                | 2                                         | 1.9×10 <sup>3</sup>                | 5                 | 20                | 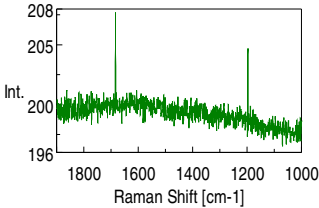   | — <sup>e</sup>        | ×                          |
| 1                                     | 1.9×10 <sup>4</sup>                | 60                | 1                                         | 1.9×10 <sup>4</sup>                | 5                 | 20                |   | — <sup>e</sup>        | ×                          |
| 0.6                                   | 5.0×10 <sup>4</sup>                | 60                | 0.6                                       | 5.0×10 <sup>4</sup>                | 5                 | 20                |  | — <sup>e</sup>        | ×                          |
| 0.3                                   | 9.7×10 <sup>4</sup>                | 60                | 0.3                                       | 9.7×10 <sup>4</sup>                | 5                 | 20                |  | — <sup>e</sup>        | ×                          |
| 0                                     | 1.9×10 <sup>5</sup>                | 60                | 0                                         | 1.9×10 <sup>5</sup>                | 5                 | 20                |  | — <sup>e</sup>        | ×                          |

<sup>a</sup> Magnification of objective lens was 100 times.

<sup>b</sup> Optical density (OD) of a neutral density (ND) filter.

<sup>c</sup> Modified spectra were displayed after subtracting linear background and normalizing them for ease of comparing them with each other. Vertical axis exhibits the Raman intensity with arbitrary unit.

<sup>d</sup> ×, ▲, and ○ denote the case when G and D bands were not detected, when it was difficult to judge detection of G and D bands, and when G and D bands were clearly detected, respectively.

<sup>e</sup> The modified spectra are shown in Fig. 2i.

**Table S10.** Carbonization and Raman measurement conditions, and the resulting raw and modified Raman spectra after exposing **4** to 532 nm laser.

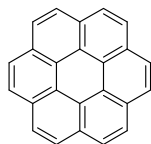

**4**

| Carbonization conditions <sup>a</sup> |                                    |                   | Raman measurment conditions <sup>a</sup> |                                    |                   |                   | Specra after laser exposure                                                        |                                                                                     |                            |
|---------------------------------------|------------------------------------|-------------------|------------------------------------------|------------------------------------|-------------------|-------------------|------------------------------------------------------------------------------------|-------------------------------------------------------------------------------------|----------------------------|
| OD <sup>b</sup>                       | Laser energy (W cm <sup>-2</sup> ) | Exposure time (s) | OD <sup>b</sup>                          | Laser energy (W cm <sup>-2</sup> ) | Exposure time (s) | Cumulative number | Raw                                                                                | Modified <sup>c</sup>                                                               | G and D bands <sup>d</sup> |
| 0                                     | 1.9×10 <sup>5</sup>                | 60                | 0                                        | 1.9×10 <sup>5</sup>                | 1                 | 20                | 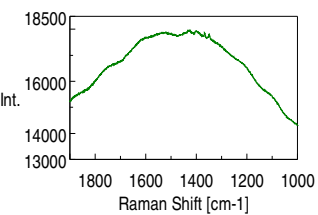 |  | ▲                          |

<sup>a</sup> Magnification of objective lens was 100 times.

<sup>b</sup> Optical density (OD) of a neutral density (ND) filter.

<sup>c</sup> Modified spectra were displayed after subtracting linear background and normalizing them for ease of comparing them with each other. Vertical axis exhibits the Raman intensity with arbitrary unit.

<sup>d</sup> ×, ▲, and ○ denote the case when G and D bands were not detected, when it was difficult to judge detection of G and D bands, and when G and D bands were clearly detected, respectively.



**Table S11.** Carbonization and Raman measurement conditions, and the resulting raw and modified Raman spectra after exposing **5** to 532 nm laser.

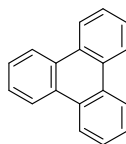

**5**

| Carbonization conditions <sup>a</sup> |                                       |                   | Raman measurement conditions <sup>a</sup> |                                       |                   |                   | Spectra after laser exposure                                                         |                                                                                       |                            |
|---------------------------------------|---------------------------------------|-------------------|-------------------------------------------|---------------------------------------|-------------------|-------------------|--------------------------------------------------------------------------------------|---------------------------------------------------------------------------------------|----------------------------|
| OD <sup>b</sup>                       | Laser energy<br>(W cm <sup>-2</sup> ) | Exposure time (s) | OD <sup>b</sup>                           | Laser energy<br>(W cm <sup>-2</sup> ) | Exposure time (s) | Cumulative number | Raw                                                                                  | Modified <sup>c</sup>                                                                 | G and D bands <sup>d</sup> |
| 2                                     | 3.8×10 <sup>3</sup>                   | 5                 | 2                                         | 3.8×10 <sup>3</sup>                   | 5                 | 20                | 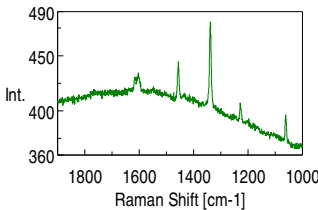   |    | ×                          |
| 1                                     | 3.8×10 <sup>4</sup>                   | 5                 | 1                                         | 3.8×10 <sup>4</sup>                   | 5                 | 20                |   |   | ×                          |
| 0.6                                   | 7.4×10 <sup>4</sup>                   | 5                 | 0.6                                       | 7.4×10 <sup>4</sup>                   | 5                 | 20                |  |  | ×                          |
| 0.3                                   | 1.5×10 <sup>5</sup>                   | 5                 | 0.3                                       | 1.5×10 <sup>5</sup>                   | 5                 | 20                |  |  | ×                          |
| 0                                     | 2.9×10 <sup>5</sup>                   | 300               | 0                                         | 2.9×10 <sup>5</sup>                   | 5                 | 20                |  |  | ▲                          |

<sup>a</sup> Magnification of objective lens was 100 times.

<sup>b</sup> Optical density (OD) of a neutral density (ND) filter.

<sup>c</sup> Modified spectra were displayed after subtracting linear background and normalizing them for ease of comparing them with each other. Vertical axis exhibits the Raman intensity with arbitrary unit.

<sup>d</sup> ×, ▲, and ○ denote the case when G and D bands were not detected, when it was difficult to judge detection of G and D bands, and when G and D bands were clearly detected, respectively.

**Table S12.** Carbonization and Raman measurement conditions, and the resulting raw and modified Raman spectra after exposing **6** to 532 nm laser.

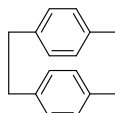

**6**

| Carbonization conditions <sup>a</sup> |                                    |                   | Raman measurment conditions <sup>a</sup> |                                    |                   |                   | Specra after laser exposure |                       |                            |
|---------------------------------------|------------------------------------|-------------------|------------------------------------------|------------------------------------|-------------------|-------------------|-----------------------------|-----------------------|----------------------------|
| OD <sup>b</sup>                       | Laser energy (W cm <sup>-2</sup> ) | Exposure time (s) | OD <sup>b</sup>                          | Laser energy (W cm <sup>-2</sup> ) | Exposure time (s) | Cumulative number | Raw                         | Modified <sup>c</sup> | G and D bands <sup>d</sup> |
| 1                                     | 1.9×10 <sup>4</sup>                | 60                | 1                                        | 1.9×10 <sup>4</sup>                | 5                 | 20                |                             |                       | ×                          |
| 0.6                                   | 4.8×10 <sup>4</sup>                | 60                | 0.6                                      | 4.8×10 <sup>4</sup>                | 5                 | 20                |                             |                       | ▲                          |
| 0.3                                   | 9.6×10 <sup>4</sup>                | 60                | 0.3                                      | 9.6×10 <sup>4</sup>                | 5                 | 20                |                             |                       | ▲                          |
| 0                                     | 1.9×10 <sup>5</sup>                | 60                | 0                                        | 1.9×10 <sup>5</sup>                | 5                 | 20                |                             |                       | ○                          |

<sup>a</sup> Magnification of objective lens was 100 times.

<sup>b</sup> Optical density (OD) of a neutral density (ND) filter.

<sup>c</sup> Modified spectra were displayed after subtracting linear background and normalizing them for ease of comparing them with each other. Vertical axis exhibits the Raman intensity with arbitrary unit.

<sup>d</sup> ×, ▲, and ○ denote the case when G and D bands were not detected, when it was difficult to judge detection of G and D bands, and when G and D bands were clearly detected, respectively.

**Table S13.** Carbonization and Raman measurement conditions, and the resulting raw and modified Raman spectra after exposing **7** to 532 nm laser.

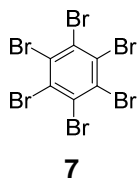

| Carbonization conditions <sup>a</sup> |                                       |                   | Raman measurment conditions <sup>a</sup> |                                       |                   |                   | Spectra after laser exposure |                       |                            |
|---------------------------------------|---------------------------------------|-------------------|------------------------------------------|---------------------------------------|-------------------|-------------------|------------------------------|-----------------------|----------------------------|
| OD <sup>b</sup>                       | Laser energy<br>(W cm <sup>-2</sup> ) | Exposure time (s) | OD <sup>b</sup>                          | Laser energy<br>(W cm <sup>-2</sup> ) | Exposure time (s) | Cumulative number | Raw                          | Modified <sup>c</sup> | G and D bands <sup>d</sup> |
| 1                                     | 1.9×10 <sup>4</sup>                   | 60                | 1                                        | 1.9×10 <sup>4</sup>                   | 5                 | 20                |                              |                       | ×                          |
| 0.6                                   | 4.9×10 <sup>4</sup>                   | 60                | 0.6                                      | 4.9×10 <sup>4</sup>                   | 5                 | 20                |                              |                       | ○                          |
| 0.3                                   | 9.7×10 <sup>4</sup>                   | 60                | 0.3                                      | 9.7×10 <sup>4</sup>                   | 5                 | 20                |                              |                       | ○                          |
| 0                                     | 1.9×10 <sup>5</sup>                   | 60                | 0                                        | 1.9×10 <sup>5</sup>                   | 5                 | 20                |                              |                       | ○                          |

<sup>a</sup> Magnification of objective lens was 100 times.

<sup>b</sup> Optical density (OD) of a neutral density (ND) filter.

<sup>c</sup> Modified spectra were displayed after subtracting linear background and normalizing them for ease of comparing them with each other. Vertical axis exhibits the Raman intensity with arbitrary unit.

<sup>d</sup> ×, ▲, and ○ denote the case when G and D bands were not detected, when it was difficult to judge detection of G and D bands, and when G and D bands were clearly detected, respectively.

**Table S14.** Carbonization and Raman measurement conditions, and the resulting raw and modified Raman spectra after exposing **8** to 532 nm laser.

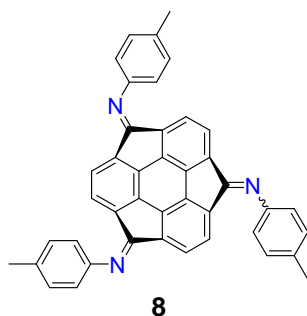

| Carbonization conditions <sup>a</sup> |                                    |                   | Raman measurement conditions <sup>a</sup> |                                    |                   |                   | Spectra after laser exposure |                       |                            |
|---------------------------------------|------------------------------------|-------------------|-------------------------------------------|------------------------------------|-------------------|-------------------|------------------------------|-----------------------|----------------------------|
| OD <sup>b</sup>                       | Laser energy (W cm <sup>-2</sup> ) | Exposure time (s) | OD <sup>b</sup>                           | Laser energy (W cm <sup>-2</sup> ) | Exposure time (s) | Cumulative number | Raw                          | Modified <sup>c</sup> | G and D bands <sup>d</sup> |
| 3                                     | 1.9×10 <sup>2</sup>                | 100               | 3                                         | 1.9×10 <sup>2</sup>                | 5                 | 20                |                              |                       | ×                          |
| 2                                     | 1.9×10 <sup>3</sup>                | 60                | 3                                         | 1.9×10 <sup>2</sup>                | 5                 | 20                |                              |                       | ▲                          |
| 1                                     | 1.9×10 <sup>4</sup>                | 60                | 3                                         | 1.9×10 <sup>2</sup>                | 5                 | 20                |                              |                       | ○                          |
| 0.6                                   | 4.9×10 <sup>4</sup>                | 60                | 3                                         | 1.9×10 <sup>2</sup>                | 5                 | 20                |                              |                       | ▲                          |
| 0.3                                   | 9.7×10 <sup>4</sup>                | 60                | 3                                         | 1.9×10 <sup>2</sup>                | 5                 | 20                |                              |                       | ○                          |
| 0                                     | 1.9×10 <sup>5</sup>                | 60                | 3                                         | 1.9×10 <sup>2</sup>                | 5                 | 20                |                              |                       | ○                          |

<sup>a</sup> Magnification of objective lens was 100 times.

<sup>b</sup> Optical density (OD) of a neutral density (ND) filter.

<sup>c</sup> Modified spectra were displayed after subtracting linear background and normalizing them for ease of comparing them with each other. Vertical axis exhibits the Raman intensity with arbitrary unit.

<sup>d</sup> ×, ▲, and ○ denote the case when G and D bands were not detected, when it was difficult to judge detection of G and D bands, and when G and D bands were clearly detected, respectively.

**Table S15.** Carbonization and Raman measurement conditions, and the resulting raw and modified Raman spectra after exposing **9** to 532 nm laser.

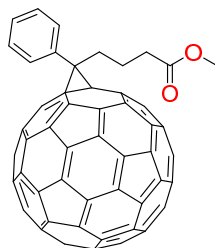

**9**

| Carbonization conditions <sup>a</sup> |                                    |                   | Raman measurement conditions <sup>a</sup> |                                    |                   |                   | Spectra after laser exposure                                                         |                                                                                       |                            |
|---------------------------------------|------------------------------------|-------------------|-------------------------------------------|------------------------------------|-------------------|-------------------|--------------------------------------------------------------------------------------|---------------------------------------------------------------------------------------|----------------------------|
| OD <sup>b</sup>                       | Laser energy (W cm <sup>-2</sup> ) | Exposure time (s) | OD <sup>b</sup>                           | Laser energy (W cm <sup>-2</sup> ) | Exposure time (s) | Cumulative number | Raw                                                                                  | Modified <sup>c</sup>                                                                 | G and D bands <sup>d</sup> |
| 2                                     | 2.2×10 <sup>2</sup>                | 300               | 2                                         | 2.2×10 <sup>3</sup>                | 10                | 5                 | 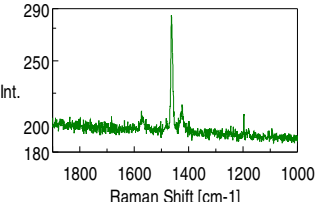   |    | ×                          |
| 1                                     | 2.2×10 <sup>3</sup>                | 300               | 2                                         | 2.2×10 <sup>3</sup>                | 10                | 5                 |   |   | ○                          |
| 0.6                                   | 5.4×10 <sup>3</sup>                | 300               | 2                                         | 2.2×10 <sup>3</sup>                | 10                | 5                 |  |  | ○                          |
| 0.3                                   | 1.0×10 <sup>4</sup>                | 300               | 2                                         | 2.2×10 <sup>3</sup>                | 10                | 5                 |  |  | ○                          |
| 0                                     | 2.0×10 <sup>4</sup>                | 300               | 2                                         | 2.2×10 <sup>3</sup>                | 10                | 5                 |  |  | ○                          |

<sup>a</sup> Magnification of objective lens was 20 times.

<sup>b</sup> Optical density (OD) of a neutral density (ND) filter.

<sup>c</sup> Modified spectra were displayed after subtracting linear background and normalizing them for ease of comparing them with each other. Vertical axis exhibits the Raman intensity with arbitrary unit.

<sup>d</sup> ×, ▲, and ○ denote the case when G and D bands were not detected, when it was difficult to judge detection of G and D bands, and when G and D bands were clearly detected, respectively.

### 3) Density functional theory (DFT) calculation

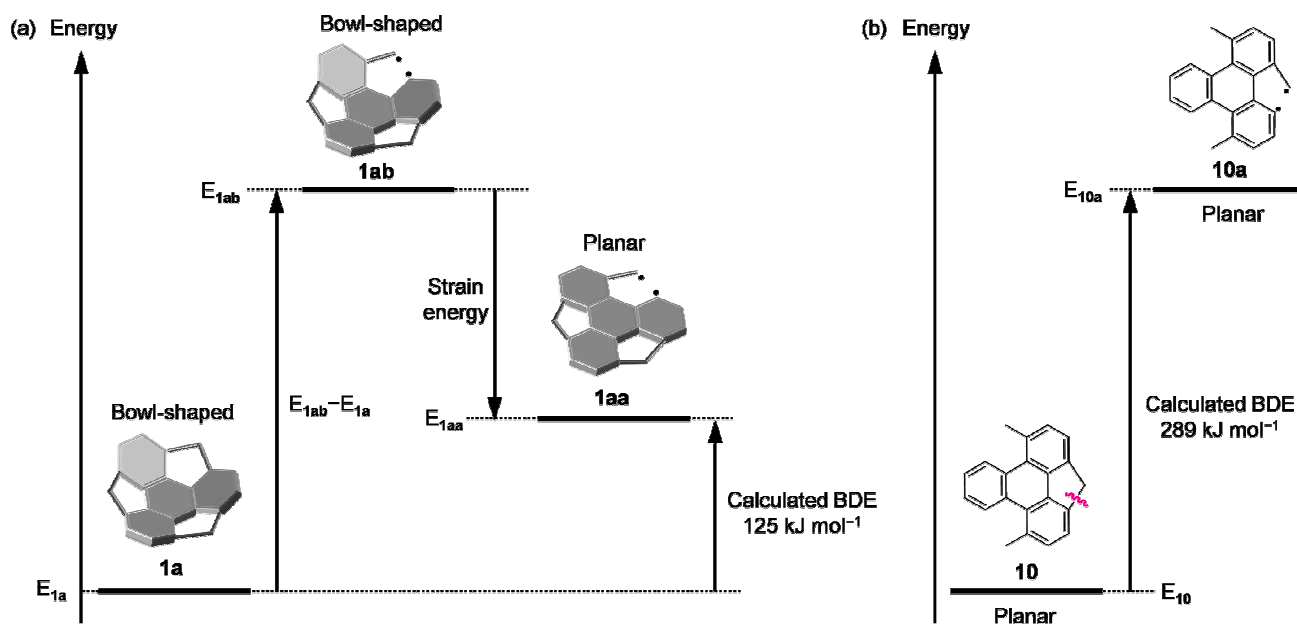

**Fig. S7.** Energy level diagrams of (a) sumanene (**1a**) and (b) 1,7-dimethyl-4*H*-cyclopenta[*def*]triphenylene (**10**) with the biradical species resulted from Ar-CH<sub>2</sub> bond dissociation.

**Table S16.** Sum of electronic and zero-point energies (E) calculated by DFT method. On the right side of the table, calculated BDEs of various bonds are summarized.

| Species                                                                             | E                      |                         | Species                                                                             | E                      |                         |
|-------------------------------------------------------------------------------------|------------------------|-------------------------|-------------------------------------------------------------------------------------|------------------------|-------------------------|
|                                                                                     | (Hartree per particle) | (kJ mol <sup>-1</sup> ) |                                                                                     | (Hartree per particle) | (kJ mol <sup>-1</sup> ) |
|    | -807.18871             | -2118210                |    | -807.141033            | -2118085                |
| <b>1a</b>                                                                           |                        |                         | <b>1aa</b>                                                                          |                        |                         |
|    | -577.456229            | -1515350                |    | -577.331545            | -1515023                |
| <b>2a</b>                                                                           |                        |                         | <b>2aa</b>                                                                          |                        |                         |
|    | -501.250544            | -1315373                |    | -501.107154            | -1314996                |
| <b>3a</b>                                                                           |                        |                         | <b>3aa</b>                                                                          |                        |                         |
|    | -809.63291             | -2124624                |    | -809.522918            | -2124335                |
| <b>10</b>                                                                           |                        |                         | <b>10a</b>                                                                          |                        |                         |
|    | -881.217211            | -2312474                |    | -881.175038            | -2312364                |
| <b>1c</b>                                                                           |                        |                         | <b>1ca</b>                                                                          |                        |                         |
|   | -881.172494            | -2312357                |   | -881.160043            | -2312324                |
| <b>1cb</b>                                                                          |                        |                         | <b>1cc</b>                                                                          |                        |                         |
|  | -651.482822            | -1709609                |  | -651.374542            | -1709325                |
| <b>2c</b>                                                                           |                        |                         | <b>2ca</b>                                                                          |                        |                         |
|  | -575.279822            | -1509639                |  | -575.155089            | -1509312                |
| <b>3c</b>                                                                           |                        |                         | <b>3ca</b>                                                                          |                        |                         |
|  | -1131.599837           | -2969524                |  | -1131.563795           | -2969429                |
| <b>1b</b>                                                                           |                        |                         | <b>1ba</b>                                                                          |                        |                         |
|  | -1131.547206           | -2969386                |  | -860.71458             | -2258672                |
| <b>1bb</b>                                                                          |                        |                         | <b>1bc</b>                                                                          |                        |                         |
|  | -901.865229            | -2366658                |  | -901.768969            | -2366406                |
| <b>2b</b>                                                                           |                        |                         | <b>2ba</b>                                                                          |                        |                         |
|  | -630.975893            | -1655796                |  | -825.660342            | -2166683                |
| <b>2bb</b>                                                                          |                        |                         | <b>3b</b>                                                                           |                        |                         |
|  | -825.542365            | -2166373                |  | -554.770702            | -1455819                |
| <b>3ba</b>                                                                          |                        |                         | <b>3bb</b>                                                                          |                        |                         |
|  | -270.78567             | -710591                 |                                                                                     |                        |                         |
| <b>11a</b>                                                                          |                        |                         |                                                                                     |                        |                         |

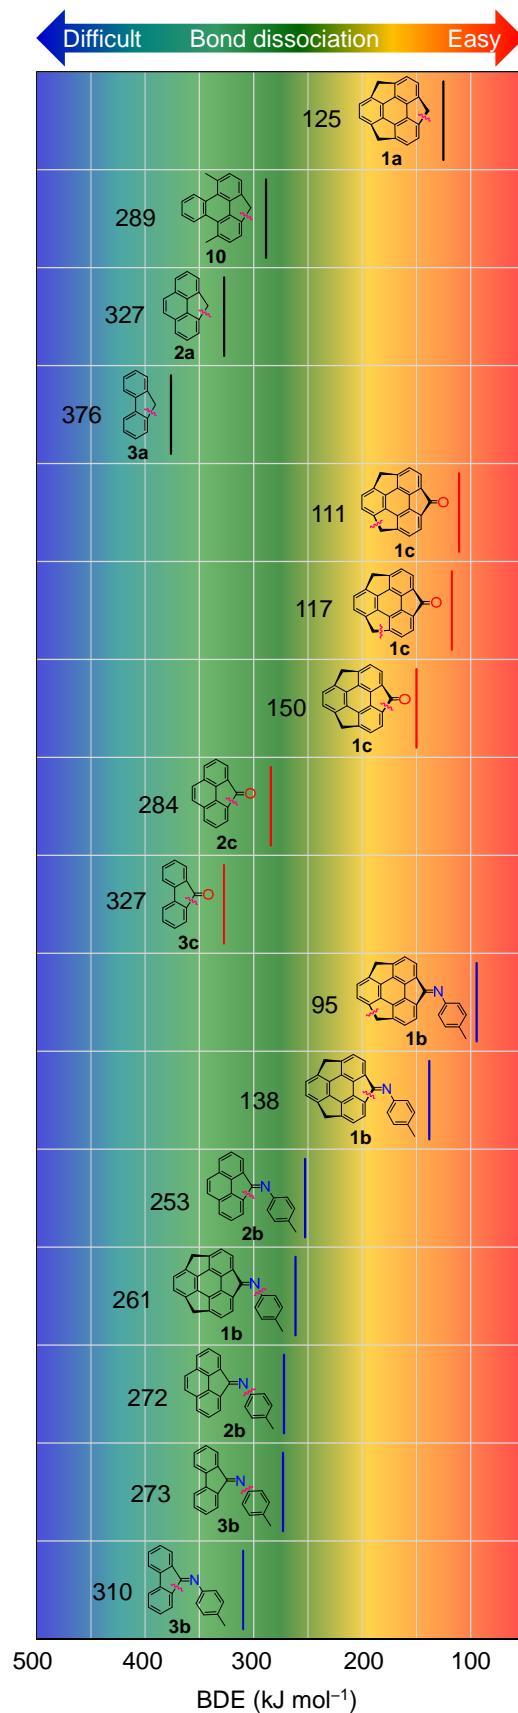

#### 4) Thermogravimetry

The thermogravimetry (TG) for **1b** was performed using a thermogravimetric analyzer (Rigaku Corp., Thermo plus EVO2 TG8121). A powder of **1b** (0.757 mg) was added into an aluminum pan, and then the temperature was increased from room temperature (17 °C) to 500 °C (5 °C min<sup>-1</sup>) under nitrogen gas flow (~100 mL min<sup>-1</sup>). Fig. S8 shows the thermogravimetric curve for **1b**. As the temperature increased, gradual weight loss was observed from room temperature. After the analysis, the weight decreased up to 0.26 mg to yield a black solid.

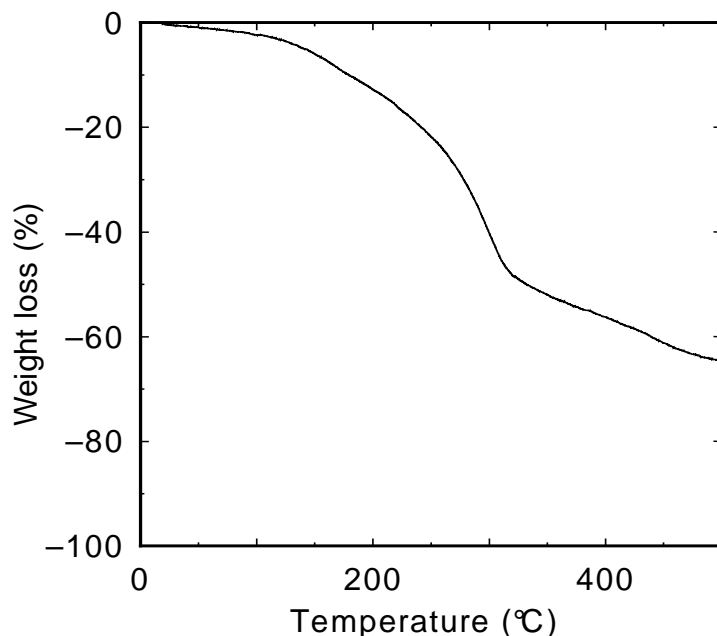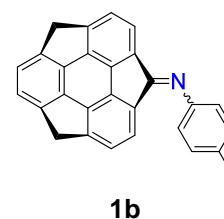

Fig. S8. TG curve for **1b**.

#### 5) Thermal pyrolysis and Raman measurements of the products

##### 5.1 Thermal pyrolysis

The heat treatment of sumanenemonoone imine **1b** was conducted employing an electric furnace (FULL TECH, FT-01X). First, three films of **1b** in total were prepared on each quartz substrate through drop-casting a dichloromethane solution of **1b** (~5 mg / 50 µL). After drying them *in vacuo*, they were heated from room temperature using the furnace to ~400, 600, or 800 °C and naturally cooled down under nitrogen gas flow by turning off the heater. The heat-treated samples are named as HT-400, HT-600, and HT-800, respectively.

In preparing HT-400, the temperature was increased to 430 °C for 1~2 min to give a dark-brown residue. Regarding HT-600, after the film of **1b** was heated, the temperature reached 607 °C for 1~2 min to yield a slight amount of a blackish residue. For the last sample (HT-800), after its temperature was raised up to 804 °C by taking ~2 min, any residue was not observed.



## 5.2 Raman measurements

The Raman spectra of the samples were measured using a micro-Raman spectrometer (JASCO, NRS-3100). The excitation wavelength was 532 nm, the slit size was  $0.1 \times 6$  mm, the magnification of the objective lens was 100 times, the exposure time was 5 s, and the laser energy under objective was  $2.2 \times 10^3$  W cm<sup>-2</sup>.

Fig. S9a–c shows the Raman spectra of pristine **1b**, HT-400, and HT-600, respectively. For pristine **1b**, a slope background was observed in its Raman spectrum due to the luminescence phenomenon (Fig. S9a). In Fig. S9b, the spectrum of HT-400 appears to consist of multiple bands at ~1593, ~1485, ~1345, ~1258 cm<sup>-1</sup> and so on, implying that it may be in the process of carbonization. On the other hand, the spectrum of HT-600 possesses typical G and D bands at ~1603 and ~1367 cm<sup>-1</sup>, suggesting that the carbonization proceeded under the pyrolysis conditions. The positions of G and D bands for the Raman spectrum of HT-600 (Fig. S9c) are similar to those of the laser-annealed film of **1b** (~1600 and ~1380 cm<sup>-1</sup>, see Fig. 2d). The positions of G bands for both HT-600 and the laser-annealed film of **1b** are considered to be assigned not to that of graphite (1581 cm<sup>-1</sup>) or amorphous carbon (~1510 cm<sup>-1</sup>) but to that of nanocrystalline graphite (~1600 cm<sup>-1</sup>) according to the literature.<sup>1</sup>

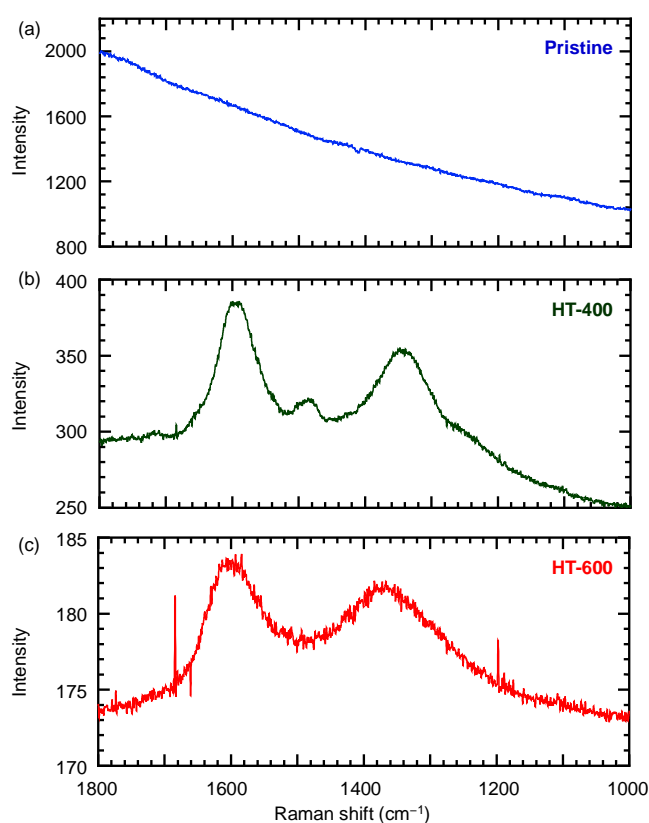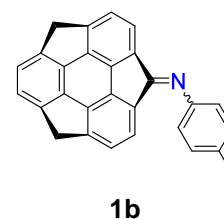

**Fig. S9.** Raman spectra for (a) pristine **1b**, (b) HT-400, and (c) HT-600.

## Reference

1. A. C. Ferrari and J. Robertson, *Philos. Trans. R. Soc., A*, 2004, **362**, 2477-2512.
